# Supplementary material for: Tylosin Inhibits Streptococcus suis Biofilm Formation by Interacting With the O-acetylserine (thiol)-lyase B CysM
Source: Frontiers journal article supplement (doi:10.3389/fvets.2021.829899), 2022-01-28
Supplement: Data_Sheet_1.zip [file Data_Sheet_1.zip]

## Sheet: Hcy
Concentration（μmoL/L）
0	0.004
1	0.079		The standard curve is on the right, and the concentration is obtained by substituting the OD value into the standard curve.								x	y
2	0.164										0	0.004
4	0.46										1	0.079
8	0.751										2	0.164
16	1.213										4	0.46
											8	0.751
											16	1.213
Without tylosin	OD450nm				Calculated concentration
WT strain	0.439	0.4668	0.387	0.4636	22.4185	24.2308	19.0287	24.0222
ΔcysM strain	0.423	0.365	0.348	0.391	21.3755	17.5945	16.4863	19.2894
CΔcysM strain	0.419	0.42	0.4	0.47	21.1147	21.1799	19.8761	24.4394
Add with tylosin	OD450nm				Calculated concentration
WT strain	0.315	0.301	0.319	0.316	14.3351	13.4224	14.5958	14.4003
ΔcysM strain	0.303	0.313	0.301	0.297	13.5528	14.2047	13.4224	13.1617
CΔcysM strain	0.358	0.381	0.368	0.389	17.1382	18.6375	17.7901	19.1591
Homocysteine

## Sheet: Cys
Concentration（μmoL/mL）
2	0.272
1	0.108
0.5	0.057
0.25	0.025
0.125	0.009
0.0625	0.004
Without tylosin	OD600nm			cysteine content
WT strain	0.125	0.124	0.125	2.47628	2.45803	2.47628
ΔcysM strain	0.116	0.115	0.117	2.31204	2.2938	2.33029
CΔcysM strain	0.119	0.12	0.124	2.36679	2.38504	2.45803
With tylosin
WT strain	0.11	0.119	0.119	2.20255	2.36679	2.36679
ΔcysM strain	0.114	0.113	0.114	2.27555	2.2573	2.27555
CΔcysM strain	0.115	0.115	0.116	2.2938	2.2938	2.31204
Cysteine

## Sheet: SAM
Concentration（pg/mL）
0	0.003
7.5	0.075
15	0.196
30	0.329
60	0.733
120	1.35
Without tylosin	OD450nm				Concentration
WT strain	0.3781	0.39	0.407	0.386	163.54	168.805	176.327	167.035
ΔcysM strain	0.302	0.313	0.279	0.281	129.867	134.735	119.69	120.575
CΔcysM strain	0.3939	0.4073	0.4007	0.393	170.531	176.46	173.54	170.133
With tylosin
WT strain	0.301	0.364	0.295	0.313	129.425	157.301	126.77	134.735
ΔcysM strain	0.217	0.272	0.213	0.235	92.2566	116.593	90.4867	100.221
CΔcysM strain	0.352	0.324	0.276	0.325	151.991	139.602	118.363	140.044
S-adenosylmethionine
